# Supplementary material for: Complement Cascade Proteins Correlate with Fibrosis and Inflammation in Early-Stage Type 1 Diabetic Kidney Disease in the Ins2Akita Mouse Model
Source: MDPI journal article supplement (doi:10.3390/ijms25031387), 2024-01-23
Supplement: s1 [file s1]

|                                  | Complement Cascade                                                                        |                                                                                                |                                                                                               |
|----------------------------------|-------------------------------------------------------------------------------------------|------------------------------------------------------------------------------------------------|-----------------------------------------------------------------------------------------------|
| <b>fibrosis-related proteins</b> | <b>Ins2Akita 2 months</b>                                                                 | <b>Ins2Akita 4 months</b>                                                                      | <b>Ins2Akita 2&amp;4months</b>                                                                |
| <b>ABAT</b>                      | <b>rs = 0.857, p = 0.007(C3), rs = 0.964, p = 0.0005 (IGHM), rs=0.635, p=0.09 (C4B)</b>   | rs = 0.143, p= 0.736 (C3), rs = -0.371, p= 0.365 (C4B), rs = 0.036, p= 0.939 (IGHM)            | <b>rs = 0.596, p= 0.019 (C3), rs = 0.346, p = 0.189 (C4B), rs = 0.632, p= 0.011 (IGHM)</b>    |
| <b>FN1</b>                       | rs = -0.285, p= 0.534 (C3), rs = -0.558, p= 0.192 (C4B), rs = -0.485, p= 0.328 (IGHM)     | <b>rs = 1, p = 0 (C3), rs = 0.761, p= 0.028 (C4B), rs = 0.214, p= 0.610 (IGHM)</b>             | rs = 0.349, p= 0.221 (C3), rs = 0.473, p = 0.075 (C4B), <b>rs = 0.674, p= 0.008 (IGHM)</b>    |
| <b>ARF6</b>                      | rs = -0.333, p= 0.419 (C3), rs = -0.059, p= 0.887 (C4B), rs = -0.75, p= 0.052 (IGHM)      | rs = -0.464, p = 0.293 (C3), <b>rs = 0.738, p = 0.037 (C4B)</b> , rs = 0.119, p = 0.778 (IGHM) | rs = -0.2, p = 0.475 (C3), rs = 0.278, p = 0.297 (C4B), rs = 0.021, p = 0.934 (IGHM)          |
| <b>STXBP1</b>                    | rs = 0.2, p= 0.747 (C3), rs = 0.051, p= 0.934 (C4B), rs = 0.4, p= 0.6 (IGHM)              | rs = -0.6, p = 0.4 (C3), <b>rs = 1, p = 0 (C4B)</b> , rs = -0.8, p = 0.2 (IGHM)                | rs = 0.55, p = 0.125 (C3), rs = 0.644, p = 0.061 (C4B), <b>rs = 0.714, p= 0.047 (IGHM)</b>    |
| <b>FLNA</b>                      | rs = 0.428, p = 0.289 (C3), rs = 0.67, p= 0.068 (C4B), rs = 0.642, p= 0.119 (IGHM)        | rs = 0.071, p = 0.879 (C3), <b>rs = 0.714 p = 0.047 (C4B)</b> , rs = 0.095, p = 0.822 (IGHM)   | <b>rs = 0.586, p = 0.022 (C3), rs = 0.79, p = 0.0002 (C4B), rs = 0.776, p = 0.0004(IGHM),</b> |
| <b>CYFIP1</b>                    | rs = -0.642, p = 0.119 (C3), rs = -0.414, p= 0.355 (C4B), rs = -0.257, p = 0.622 (IGHM)   | rs = 0.535, p = 0.215 (C3), <b>rs = 0.762, p = 0.028 (C4B)</b> , rs = 0.428, p = 0.289 (IGHM)  | rs = -0.147, p = 0.615 (C3), rs = 0.048, p = 0.864 (C4B), rs = 0.09, p = 0.76 (IGHM)          |
| <b>MYOF</b>                      | <b>rs = 0.81, p = 0.015(C3), rs = 0.826, p = 0.011 (C4B), rs = 0.929, p= 0.002 (IGHM)</b> | rs = 0.142, p = 0.759 (C3), <b>rs = 0.905, p = 0.002 (C4B)</b> , rs = 0.38, p = 0.352 (IGHM)   | <b>rs = 0.603, p = 0.017(C3), rs = 0.892, p = 0 (C4B), rs = 0.786, p = 0.0005 (IGHM)</b>      |
| <b>IQGAP1</b>                    | rs = -0.69, p = 0.058 (C3), rs = -0.071, p= 0.866 (C4B), rs = -0.357, p= 0.43 (IGHM)      | rs = -0.178, p = 0.702 (C3), <b>rs = 0.714, p = 0.047 (C4B)</b> , rs = 0.357, p = 0.385 (IGHM) | rs = -0.21, p= 0.451 (C3), rs = 0.21, p = 0.437 (C4B), rs = 0.235, p = 0.4 (IGHM)             |
| <b>ITGB1</b>                     | rs = 0.19, p = 0.651 (C3), rs = 0.191, p = 0.649 (C4B), rs = 0.607, p = 0.148 (IGHM)      | rs = 0.214, p = 0.645 (C3), <b>rs=0.69, p=0.058 (C4B)</b> , rs = 0.452, p = 0.26 (IGHM)        | rs = 0.467, p = 0.079 (C3), <b>rs = 0.596, p = 0.015 (C4B), rs = 0.675, p = 0.006 (IGHM)</b>  |
| <b>ITGA1</b>                     | <b>rs = 0.762 p = 0.028 (C3), rs = 0.61, p= 0.108 (C4B), rs = 0.929, p = 0.003 (IGHM)</b> | rs = 0.178, p = 0.702 (C3), rs = 0.357, p = 0.385 (C4B), rs = 0.166, p = 0.693 (IGHM)          | <b>rs = 0.664, p= 0.007(C3), rs = 0.57 p = 0.021(C4B), rs = 0.693, p = 0.004 (IGHM)</b>       |

**Supplementary Table S1.** Results of the Spearman rho correlation analysis of expression of the complement proteins vs fibrosis-related proteins performed in mice of 2-months, 4-months-old and the two groups combined. Statistically significant correlations are highlighted in green. The complement protein names with statistically significant correlation of expression with fibrosis-related proteins are shown into parentheses.

|                                      | Complement Cascade                                                                         |                                                                                          |                                                                                              |
|--------------------------------------|--------------------------------------------------------------------------------------------|------------------------------------------------------------------------------------------|----------------------------------------------------------------------------------------------|
| <b>inflammation-related proteins</b> | <b>Ins2Akita 2months</b>                                                                   | <b>Ins2Akita 4months</b>                                                                 | <b>Ins2Akita 2&amp;4months</b>                                                               |
| <b>CD81</b>                          | rs = 0.428, p= 0.337 (C3), rs = 0.142, p= 0.759 (C4B), rs = 0.714, p= 0.11 (IGHM)          | rs = 0.107, p= 0.819 (C3), rs = 0.214, p= 0.644 (C4B), rs = -0.178, p= 0.701 (IGHM)      | <b>rs = 0.534, p= 0.049 (C3), rs = 0.56, p= 0.037 (C4B), rs = 0.742, p = 0.004 (IGHM)</b>    |
| <b>ICAM1</b>                         | rs = -0.1, p= 0.872 (C3), rs = -0.1, p= 0.872 (C4B), rs = -0.8, p= 0.2 (IGHM)              | rs = 0.6, p= 0.208 (C3), <b>rs = 0.857, p= 0.013 (C4B)</b> , rs = 0.75, p= 0.052 (IGHM)  | rs = 0.572, p = 0.066 (C3), <b>rs = 0.622 p= 0.031 (C4B), rs = 0.8, p= 0.003 (IGHM)</b>      |
| <b>VNN1</b>                          | <b>rs = 0.9, p= 0.037 (C3), rs = 0.9, p= 0.037 (C4B)</b> , rs = 0.8, p= 0.2 (IGHM)         | rs = 0.3, p= 0.623 (C3), rs = -0.25714, p= 0.622 (C4B), rs = -0.25714, p= 0.622 (IGHM)   | <b>rs = 0.745, p = 0.013 (C3)</b> , rs = 0.363, p= 0.272 (C4B), rs = 0.454, p = 0.187 (IGHM) |
| <b>SNAP23</b>                        | rs = 0.2619, p= 0.531 (C3), rs = 0.08383, p= 0.844 (C4B), <b>rs = 0.75, p= 0.05 (IGHM)</b> | rs = 0.286, p= 0.535 (C3), <b>rs =0.857, p=0.006 (C4B)</b> , rs = 0.357, p= 0.385 (IGHM) | <b>rs = 0.568, p= 0.03 (C3), rs = 0.487, p= 0.05 (C4B), rs = 0.71, p= 0.003 (IGHM)</b>       |

|               |                                                                                           |                                                                                          |                                                                                    |
|---------------|-------------------------------------------------------------------------------------------|------------------------------------------------------------------------------------------|------------------------------------------------------------------------------------|
| <b>HSPD1</b>  | <b>rs= 0.762, p= 0.028 (C3), rs = 0.4551, p= 0.257 (C4B), rs = 0.929, p= 0.003 (IGHM)</b> | rs = 0.214, p= 0.64 (C3), rs = -0.333, p= 0.42 (C4B), rs = 0.095, p= 0.823 (IGHM)        | rs = 0.396, p= 0.143 (C3), rs = 0.115, p= 0.672 (C4B), rs = 0.204, p= 0.467 (IGHM) |
| <b>TSPAN2</b> | <b>rs = -0.9, p= 0.037 (C3), rs = -0.9, p= 0.037 (C4B), rs = -0.8, p= 0.2 (IGHM)</b>      | rs = 0.142, p= 0.76 (C3), <b>rs = 0.762, p= 0.028 (C4B), rs = 0.381, p= 0.352 (IGHM)</b> | rs = -0.161, p= 0.618 (C3), rs = 0.269, p= 0.373 (C4B), rs = 0.328, p= 0.3 (IGHM)  |

**Supplementary Table S2.** Results of the Spearman rho correlation analysis of expression of the complement proteins vs inflammation-related proteins performed between in mice of 2-months, 4-months-old and the two groups combined. Statistically significant correlations are highlighted in green. Complement proteins with statistically significant correlation of expression with inflammation-related proteins are shown into parentheses.
